# Supplementary material for: Replacement of Albumin by Preovulatory Oviductal Fluid in Swim-Up Sperm Preparation Method Modifies Boar Sperm Parameters and Improves In Vitro Penetration of Oocytes
Source: MDPI journal article supplement (doi:10.3390/ani11051202), 2021-04-22
Supplement: s1 [file s1]

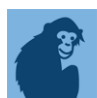

**Table S1.** Sperm motility before treatment with swim-up (Before SU) and after sperm selection by swim-up method with different protein supplementation: 1 mg/mL BSA (1BSA), 1% v/v pOF (1pOF), 1 mg/mL BSA + 1% v/v pOF (1BSA-1pOF) and 5 mg/mL BSA (5BSA). Samples were measured by computer assisted semen analysis (CASA) and expressed as mean  $\pm$  SEM. Curvilinear velocity (VCL, mm/s), straight-line velocity (VSL, mm/s), average path velocity (VAP, mm/s), linearity of the curvilinear trajectory (LIN, ratio of VSL/ VCL, %), straightness (STR, ratio of VSL/VAP, %), wobble of the curvilinear trajectory (WOB, ratio of VAP/VCL, %), amplitude of lateral head displacement (ALH, mm) and beat cross-frequency (BCF, Hz).

| Group     | N  | Progressive motility (%)       | VCL ( $\mu\text{m s}^{-1}$ )   | VSL ( $\mu\text{m s}^{-1}$ )  | VAP ( $\mu\text{m s}^{-1}$ )  | LIN (%)                       | STR (%)                       | WOB (%)                       | ALH ( $\mu\text{m}$ )         | BCF (Hz)                      |
|-----------|----|--------------------------------|--------------------------------|-------------------------------|-------------------------------|-------------------------------|-------------------------------|-------------------------------|-------------------------------|-------------------------------|
| Before SU | 18 | 49.89 $\pm$ 4.41 <sup>a</sup>  | 67.91 $\pm$ 2.99 <sup>ab</sup> | 21.58 $\pm$ 1.51 <sup>a</sup> | 38.80 $\pm$ 1.89 <sup>a</sup> | 33.51 $\pm$ 1.86 <sup>a</sup> | 55.51 $\pm$ 1.75 <sup>a</sup> | 56.88 $\pm$ 1.38 <sup>a</sup> | 2.81 $\pm$ 0.10 <sup>ab</sup> | 6.57 $\pm$ 0.23 <sup>ab</sup> |
| 1BSA      | 18 | 51.22 $\pm$ 3.23 <sup>a</sup>  | 75.53 $\pm$ 3.63 <sup>ac</sup> | 44.88 $\pm$ 3.47 <sup>b</sup> | 53.44 $\pm$ 3.19 <sup>b</sup> | 54.64 $\pm$ 2.93 <sup>b</sup> | 75.00 $\pm$ 2.16 <sup>b</sup> | 69.22 $\pm$ 2.10 <sup>b</sup> | 2.92 $\pm$ 0.12 <sup>ab</sup> | 6.47 $\pm$ 0.24 <sup>ab</sup> |
| 1pOF      | 18 | 34.96 $\pm$ 4.76 <sup>b</sup>  | 59.28 $\pm$ 5.40 <sup>b</sup>  | 32.71 $\pm$ 2.50 <sup>c</sup> | 39.18 $\pm$ 3.09 <sup>a</sup> | 54.66 $\pm$ 2.60 <sup>b</sup> | 77.49 $\pm$ 1.76 <sup>b</sup> | 67.05 $\pm$ 1.91 <sup>b</sup> | 2.54 $\pm$ 0.21 <sup>a</sup>  | 5.86 $\pm$ 0.22 <sup>a</sup>  |
| 1BSA-1pOF | 18 | 55.50 $\pm$ 2.84 <sup>ac</sup> | 75.34 $\pm$ 3.13 <sup>ac</sup> | 44.86 $\pm$ 2.50 <sup>b</sup> | 53.86 $\pm$ 2.30 <sup>b</sup> | 55.18 $\pm$ 2.84 <sup>b</sup> | 74.04 $\pm$ 2.43 <sup>b</sup> | 69.88 $\pm$ 1.62 <sup>b</sup> | 2.93 $\pm$ 0.14 <sup>ab</sup> | 6.47 $\pm$ 0.14 <sup>ab</sup> |
| 5BSA      | 18 | 66.39 $\pm$ 1.94 <sup>c</sup>  | 87.79 $\pm$ 3.08 <sup>c</sup>  | 54.62 $\pm$ 3.44 <sup>b</sup> | 65.95 $\pm$ 3.21 <sup>c</sup> | 56.98 $\pm$ 2.42 <sup>b</sup> | 74.28 $\pm$ 2.00 <sup>b</sup> | 72.98 $\pm$ 1.61 <sup>b</sup> | 3.13 $\pm$ 0.09 <sup>b</sup>  | 7.18 $\pm$ 0.18 <sup>b</sup>  |
| P-value   |    | <0.01                          | <0.01                          | <0.01                         | <0.01                         | <0.01                         | <0.01                         | <0.01                         | 0.05                          | <0.01                         |

<sup>a-c</sup> Values in the same column with different superscripts are significantly different ( $p < 0.05$ ). N, number of samples.

**Table S2.** Summary of sperm motility parameters derived from cluster analysis motility of spermatozoa selected by swim-up method with different protein supplementation: 1 mg/mL BSA (1BSA), 1% v/v pOF (1pOF), 1 mg/mL BSA + 1% v/v pOF (1BSA-1pOF) and 5 mg/mL BSA (5BSA). Cluster assay is based in VAP, VSL, BCF and ALH valued obtained by computer assisted semen analysis and expressed as mean  $\pm$  SEM. Curvilinear velocity (VCL, mm/s), straight-line velocity (VSL, mm/s), average path velocity (VAP, mm/s), linearity of the curvilinear trajectory (LIN, ratio of VSL/ VCL, %), straightness (STR, ratio of VSL/VAP, %), wobble of the curvilinear trajectory (WOB, ratio of VAP/VCL, %), amplitude of lateral head displacement (ALH, mm) and beat cross-frequency (BCF, Hz).

| Group                 | N    | VCL ( $\mu\text{m s}^{-1}$ )   | VSL ( $\mu\text{m s}^{-1}$ )   | VAP ( $\mu\text{m s}^{-1}$ )   | LIN (%)                       | STR (%)                       | WOB (%)                       | ALH ( $\mu\text{m}$ )        | BCF (Hz)                     |
|-----------------------|------|--------------------------------|--------------------------------|--------------------------------|-------------------------------|-------------------------------|-------------------------------|------------------------------|------------------------------|
| Slow no progressive   | 2601 | 43.12 $\pm$ 0.43 <sup>a</sup>  | 11.12 $\pm$ 0.14 <sup>a</sup>  | 22.33 $\pm$ 0.17 <sup>a</sup>  | 29.60 $\pm$ 0.41 <sup>a</sup> | 50.56 $\pm$ 0.54 <sup>a</sup> | 55.98 $\pm$ 0.34 <sup>a</sup> | 2.17 $\pm$ 0.02 <sup>a</sup> | 4.90 $\pm$ 0.04 <sup>a</sup> |
| Medium no progressive | 2006 | 81.04 $\pm$ 0.67 <sup>b</sup>  | 33.75 $\pm$ 0.26 <sup>b</sup>  | 51.06 $\pm$ 0.27 <sup>b</sup>  | 47.83 $\pm$ 0.52 <sup>b</sup> | 68.99 $\pm$ 0.57 <sup>b</sup> | 67.38 $\pm$ 0.35 <sup>b</sup> | 3.34 $\pm$ 0.03 <sup>b</sup> | 7.31 $\pm$ 0.05 <sup>b</sup> |
| Medium progressive    | 1439 | 103.09 $\pm$ 0.62 <sup>c</sup> | 66.12 $\pm$ 0.31 <sup>c</sup>  | 74.42 $\pm$ 0.29 <sup>c</sup>  | 67.18 $\pm$ 0.46 <sup>c</sup> | 88.88 $\pm$ 0.36 <sup>c</sup> | 74.38 $\pm$ 0.34 <sup>c</sup> | 3.79 $\pm$ 0.03 <sup>c</sup> | 8.37 $\pm$ 0.07 <sup>c</sup> |
| Fast progressive      | 699  | 130.18 $\pm$ 0.68 <sup>d</sup> | 106.73 $\pm$ 0.58 <sup>d</sup> | 107.63 $\pm$ 0.51 <sup>d</sup> | 82.49 $\pm$ 0.39 <sup>d</sup> | 97.09 $\pm$ 0.18 <sup>d</sup> | 83.25 $\pm$ 0.31 <sup>d</sup> | 3.94 $\pm$ 0.04 <sup>d</sup> | 9.20 $\pm$ 0.09 <sup>d</sup> |
| P-value               |      | <0.01                          | <0.01                          | <0.01                          | <0.01                         | <0.01                         | <0.01                         | <0.01                        | <0.01                        |

<sup>a-d</sup> Values in the same column with different superscripts are significantly different ( $p < 0.05$ ). N, number of spermatozoa analyzed per group.
